# Supplementary material for: Fire activity in the northern Arctic tundra now exceeds late Holocene levels, driven by increasing dryness and shrub expansion
Source: Copernicus journal article supplement (doi:10.5194/egusphere-2025-2318), 2025-05-30
Supplement: Supplementary file 1 [file Supplement_S1.xlsx]

## Sheet: Fire_Points_Near_Dalton
FID_Fire_Points_Albers_NAD83	Count	ID	RECORDNUMBER	NAME	FIRESEASON	LASTUPDATETIME	MGMTORGID	MGMTOFFICEID	MGMTOPTIONID	PRESCRIBEDFIRE	LATITUDE	LONGITUDE	MAPNAME	MAPNUMBER	NEARESTWEATHERSTA	ORIGINOWNERID	OWNERKIND	ORIGINADMINUNITID	DISCOVERYDATETIME	DISCOVERYSIZE	IADATETIME	IASIZE	INITIALBEHAVIOR	CONTROLDATETIME	OUTDATE	FIRECAUSE	GENERALCAUSE	ORIGINSLOPE	ORIGINASPECT	ORIGINELEVATION	ORIGINTOWNSHIP	ORIGINRANGE	ORIGINSECTION	ORIGINQUARTER	ORIGINMERIDIAN	STRUCTURESTHREATENED	STRUCTURESBURNED	PRIMARYFUELTYPE	HARDCOPYREPORTAVAILABLE	TYPE1ASSIGNEDDATE	TYPE1RELEASEDDATE	TYPE2ASSIGNEDDATE	TYPE2RELEASEDDATE	AFSNUMBER	DOFNUMBER	USFSNUMBER	ADDITIONALNUMBER	FORCESITRPT	FORCESITRPTSTATUS
11493	1	1759	265	Sagavanirktok River	2004	2023-07-07 23:37:42	AFS	TAD	Limited	N	68.5344	-149.039	PHILIP SMITH MTNS C-4			BLM		NOD	2004-06-15 00:49:00	0		0		2004-06-17 23:30:00	2004-06-17 08:00:00	Natural	Lightning	0-25	Flat	1501-2500	010S	013E	34		Umiat	0	0							A43X
9765	2	26429	153	False Alarm 3	2007	2023-07-07 23:37:42	AFS	TAD	Limited	N	68.6461	-149.635	PHILIP SMITH MTNS C-5			BLM		NOD	2007-05-22 19:16:18	0		0			2007-05-23 00:13:28	False Alarm	False Alarm	0-25	Flat	1501-2500	009S	011E	19		Umiat	0	0							DF5E
8558	3	69515	U002	Aulacomnium	2009	2023-03-07 21:21:51				N	68.7014	-150.565	CHANDLER LAKE C-1						2009-07-04 08:00:00	0.1		0.1			2009-10-01 08:00:00	Natural	Lightning	0-25	Flat	0501-1500	008S	007E	31		Umiat	0	0
7886	4	69524	U006	Eriophorum	2010	2023-03-07 21:13:47				N	68.7675	-150.674	CHANDLER LAKE D-2						2010-06-14 08:00:00	0.1		0.1			2010-10-01 08:00:00	Natural	Lightning	0-25	Flat	1501-2500	008S	006E	10		Umiat	0	0
3267	5	69552	U001	Arnica	2017	2023-03-07 17:37:17				N	68.7861	-150.707	CHANDLER LAKE D-2						2017-08-10 08:00:00	1		0.1			2017-10-01 08:00:00	Natural	Lightning	0-25	Flat	1501-2500	007S	006E	33		Umiat	0	0
7956	6	69537	U019	Tussock	2010	2023-03-07 19:17:23				N	68.7808	-150.282	CHANDLER LAKE D-1						2010-06-08 08:00:00	0.1		0.1			2010-10-01 08:00:00	Natural	Lightning	0-25	Flat	1501-2500	008S	008E	5		Umiat	0	0
8559	7	69517	U003	Nana	2009	2023-03-07 21:20:22				N	68.8225	-151.045	CHANDLER LAKE D-2						2009-07-04 08:00:00	0.1		0.1			2009-10-01 08:00:00	Natural	Lightning	0-25	Flat	0501-1500	007S	005E	19		Umiat	0	0
20364	8	69507	U001	Betula	1986	2023-03-07 21:29:28				N	68.8203	-150.887	CHANDLER LAKE D-2						1986-06-27 08:00:00	0.1		0.1			1986-10-01 08:00:00	Natural	Lightning	0-25	Flat	0501-1500	007S	005E	23		Umiat	0	0
7955	9	69534	U016	Pulchra	2010	2023-03-07 19:20:50				N	68.825	-150.961	CHANDLER LAKE D-2						2010-06-08 08:00:00	0.1		0.1			2010-10-01 08:00:00	Natural	Lightning	0-25	Flat	1501-2500	007S	005E	21		Umiat	0	0
7954	10	69532	U014	Planifolia	2010	2023-03-07 19:22:32				N	68.8358	-151.061	CHANDLER LAKE D-2						2010-06-08 08:00:00	0.1		0.1			2010-10-01 08:00:00	Natural	Lightning	0-25	Flat	0501-1500	007S	004E	13		Umiat	0	0
21376	11	69502	U001	Salix	1984	2023-03-07 21:34:51				N	68.8622	-150.696	CHANDLER LAKE D-2						1984-06-30 08:00:00	0.1		0.1			1984-10-01 08:00:00	Natural	Lightning	0-25	Flat	0501-1500	007S	006E	4		Umiat	0	0
7953	12	69529	U011	Nanushek	2010	2023-03-07 19:25:45				N	68.8667	-150.614	CHANDLER LAKE D-2						2010-06-08 08:00:00	0.1		0.1			2010-10-01 08:00:00	Natural	Lightning	0-25	Flat	0501-1500	007S	006E	1		Umiat	0	0
6976	13	69538	U001	Horsetail	2011	2023-03-07 19:09:43				N	68.8781	-150.679	CHANDLER LAKE D-2						2011-08-04 08:00:00	0.1		0.1			2011-10-01 08:00:00	Natural	Lightning	0-25	Flat	1501-2500	006S	006E	34		Umiat	0	0
11491	14	1707	219	Kuparuk River	2004	2023-07-07 23:37:42	AFS	TAD	Limited	N	68.9117	-149.553	PHILIP SMITH MTNS D-5			STA		L&W	2004-06-15 01:14:00	0		0		2004-06-25 01:30:00	2004-06-24 08:00:00	Natural	Lightning	0-25	Flat	1501-2500	006S	011E	20		Umiat	0	0							A4VR	431219
8691	15	32684	479	Itkillik River	2009	2023-07-07 23:37:42	AFS	TAD	Limited	N	68.9522	-150.074	CHANDLER LAKE D-1			FWS		ARR	2009-06-09 18:30:22	0		0			2009-07-20 15:22:56	Natural	Lightning	0-25	Flat	0501-1500	006S	009E	6		Umiat	0	0							E2SU
284	16	69699	121	Nanushuk	2023	2023-10-04 19:09:59	AFS	TAD	Limited	N	69.01	-150.669	UMIAT A-2			State	Other	AKDNS-AK Dept. Natural Resources	2023-06-14 23:17:00	0.1		0.1		2023-07-18 16:43:00	2023-07-18 16:43:00	Natural	Lightning	0-25	Flat	0501-1500						0	0							P9QX		PDP9QX
21948	18	48662		ST-313058	1983	2021-10-18 20:57:56		TAL	Unplanned	N	69.0507	-150.693	UMIAT A-2			STA			1983-07-26 01:55:00	0.1		0.1			1983-07-26 21:00:00	Natural	Lightning	0-25	Flat	0501-1500	003S	006E	33		Umiat	0	0							8909	313058
12996	19	65	218	Kuparuk River	2001	2023-04-11 21:18:17	AFS	TAD	Limited	N	69.027	-149.561	SAGAVANIRKTOK A-5			BLM		NOD	2001-06-14 01:04:48	100	2001-06-16 19:04:48	844.7	Running	2001-07-06 00:04:48	2001-07-06 00:04:48	Natural		0-25	Flat	0501-1500	005S	011E	8		Umiat	0	0							B218
3326	20	39866	330	Anaktuvuk 2	2017	2023-07-07 23:37:42	AFS	TAD	Limited	N	69.0806	-150.746	UMIAT A-2		500104-UMT-UMIAT AIRFIELD	State	Other	AKAKS-Alaska-Other	2017-07-11 05:13:19	50	2017-07-11 05:13:59	0.1	Out	2017-07-11 06:01:04	2017-07-11 06:01:04	Natural	Lightning	0-25	Flat	0501-1500	004S	006E	20		Umiat	0	0							K5BP	731330
5030	21	37977	174	False Alarm 04	2015	2023-07-07 23:37:42	AFS	UYD	Limited	N	69.0333	-148.25	SAGAVANIRKTOK A-3		500104-UMT-UMIAT AIRFIELD	USFWS	Federal	AKARR-Arctic National Wildlife Refuge	2015-05-23 22:59:32	0		0	Unknown			False Alarm	False Alarm	0-25	Flat	1501-2500	005S	016E	2		Umiat	0	0	Black Spruce						JQ1M		PDJQ1M
27905	22	44269		Lupine River	1971	2020-10-30 17:30:37		Arctic	Unplanned	N	69.0667	-148.683	SAGAVANIRKTOK A-3						1971-07-09 08:00:00	0.1		0.1			1971-07-09 08:00:00	Natural	Lightning	0-25	Flat	0501-1500	004S	014E	26		Umiat	0	0							8826
22575	23	48882		DEADHORSE	1982	2023-07-07 23:37:42		TAL	Unplanned	N	69.25	-150	SAGAVANIRKTOK B-5			BLM			1982-07-13 08:00:00	0		0			1982-07-14 08:00:00	Natural	Natural	0-25	Flat	0501-1500	002S	009E	20		Umiat	0	0							8713
9425	24	26953	499	Kuparuk	2007	2023-07-07 23:37:42	AFS	TAD	Limited	N	69.2883	-150.336	UMIAT B-1			STA		L&W	2007-07-15 00:58:28	0		0			2007-08-11 01:40:19	Natural	Lightning	0-25	Flat	0501-1500	002S	007E	12		Umiat	0	0							DQV4
3402	25	39761	251	Gilead	2017	2023-07-07 23:37:42	AFS	UYD	Limited	N	69.3066	-148.078	SAGAVANIRKTOK B-2		500104-UMT-UMIAT AIRFIELD	State	Other	AKAKS-Alaska-Other	2017-06-20 21:21:02	300	2017-06-20 21:21:26	300	Smoldering	2017-07-09 21:55:26	2017-07-09 22:00:26	Natural	Lightning	0-25	Flat	0501-1500	001S	017E	32		Umiat	0	0	Tundra						K2KW	731251
3404	26	39758	249	False Alarm 002	2017	2023-07-07 23:37:42	AFS	UYD	Limited	N	69.3207	-148.049	SAGAVANIRKTOK B-2		500104-UMT-UMIAT AIRFIELD	State	Other	AKAKS-Alaska-Other	2017-06-19 22:31:51	0		0				False Alarm	False Alarm	0-25	Flat	0501-1500	001S	017E	28		Umiat	0	0	Tundra						K2GS
21950	27	48659		ST-313056	1983	2021-10-18 21:14:16		TAL	Unplanned	N	69.3763	-149.415	SAGAVANIRKTOK B-5			STA			1983-07-25 19:59:00	0.1		0.1			1983-07-29 08:00:00	Natural	Lightning	0-25	Flat	0501-1500	001N	010E	25		Umiat	0	0	Tundra						8906	313056
23795	28	47154		Deadhorse	1979	2021-03-04 17:42:13		Fairbanks	Unplanned	N	69.4167	-148.917	SAGAVANIRKTOK B-4			BLM			1979-07-20 08:00:00	0.1		0.1			1979-07-22 08:00:00	Natural	Lightning	0-25	Flat	0501-1500	001N	013E	27		Umiat	0	0							8694
9356	29	27025	567	Sagavanirktok	2007	2023-07-07 23:37:42	AFS	TAD	Limited	N	69.4681	-148.336	SAGAVANIRKTOK B-3			STA		L&W	2007-09-08 00:31:42	0		0		2007-10-09 20:03:39	2007-10-09 20:03:39	Natural	Lightning	0-25	Flat	0501-1500	001N	015E	1		Umiat	0	0	Tundra						DZ3U	731567			2007-10-16 08:00:00
19342	30	24565		31054	1990	2023-07-07 23:37:42	AFS	TAD	Limited	N	69.6333	-148.5	SAGAVANIRKTOK C-3			STA			1990-07-05 08:00:00	0		0			1990-07-22 08:00:00	Natural		0-25	Flat	0501-1500	003N	015E	8		Umiat	0	0							A313	31054	P01028
28359	31	43426		Sagwon	1970	2020-10-02 23:28:26		FAIRBANKS	Unplanned	N	69.6667	-148.983	SAGAVANIRKTOK C-4			Fed			1970-08-05 08:00:00	0.1		0.1			1970-08-05 08:00:00	Human	Equipment	0-25	Flat	0-500	004N	013E	29		Umiat	0	0							9893
9013	32	28381	324	Kavik River	2008	2023-07-07 23:37:42	AFS	TAD	Limited	N	69.7775	-147.145	SAGAVANIRKTOK D-1			STA		L&W	2008-07-09 04:21:03	40		0			2008-07-30 21:47:10	Natural	Lightning	0-25	Flat	0-500	005N	020E	21		Umiat	0	0							EA51	831324
28978	33	42963		Arpino	1969	2020-10-02 23:27:10		ARC	Unplanned	N	70.0833	-147.833	BEECHEY POINT A-2			F			1969-07-07 20:00:00	0.1		0.1			1969-07-27 08:00:00	Natural	Lightning	0-25	Flat	0-500	008N	017E	2		Umiat	0	0							9557
7011	34	35284	499	Ugnuravik River	2011	2023-07-07 23:37:42	AFS	TAD	Limited	N	70.2925	-149.876	BEECHEY POINT B-5			STA		L&W	2011-07-21 01:40:32	0.1		0		2011-07-21 21:32:33	2011-07-21 21:32:33	Human	Human	0-25	Flat	0-500	011N	009E	21		Umiat	0	0	Tundra						F70C	131499
5339	35	37530	314	Kuparuk	2014	2023-07-07 23:37:42	AFS	TAD	Limited	N	70.3307	-149.598	BEECHEY POINT B-5		NoWIMS-IGK-INIGOK AIRFIELD	State	Other	AKAKS-AK - Other DNR Owned/Managed	2014-07-01 23:23:08	0.1	2014-07-02 00:27:09	0.1	Smoldering	2014-07-02 00:27:09	2014-07-03 21:29:27	Human	Human	0-25	Flat	0-500	011N	010E	4		Umiat	0	0	Tundra						H6W5	431314
[truncated: 33 more columns]

## Sheet: Fire Polygons_Near Dalton
Count	NAME	Near_Dist_Km	FIREYEAR	FIRESEASON	Area_ha	Shape_Area_m	Shape_Length_m	SOURCE	UPDATEUSER
1	Anaktuvuk 2	68.9121	2017	2010 - 2019	24.2209	242209	1905.14	Image Interpretation	jljenkins
2	Gilead	24.3952	2017	2010 - 2019	115.165	1.15165e+06	7163.63	Image Interpretation	jljenkins
3	Itkillik River	41.0027	2009	2000 - 2009	21.478	214780	1838.33	Image Interpretation	jljenkins
4	Sagavanirktok	4.80845	2007	2000 - 2009	1279.02	1.27902e+07	31858.7	Digitized	pmartyn
5	Anaktuvuk River	38.1149	2007	2000 - 2009	103897	1.03897e+09	204733	Not Recorded	cdoolin
6	Kuparuk	58.104	2007	2000 - 2009	684.967	6.84967e+06	28320.8	Digitized	jnorthway
7	Kuparuk River	26.7084	2001	2000 - 2009	263.287	2.63287e+06	9410.55	Image Interpretation	jljenkins
8	031054	10.8626	1990	1990 - 1999	57.9702	579702	3318.63	Image Interpretation	jljenkins
9	ST-313056	25.6273	1983	1980 - 1989	84.588	845880	4882.9	Image Interpretation	jljenkins

## Sheet: Distance to five nearest fires
Research (charcoal) Sites	I=first nearest fire	II=second nearest fire	III=thrid nearest fire	IV=nearest fire	V=fifthe nearest fire
Toolik I	12.1362	16.0261	32.8635	42.0869	45.3215
Toolik II	2.89175	25.0303	31.8019	32.9508	40.6304
Ga II	12.2232	17.3311	30.6836	41.4743	43.0774
Ga I	12.2232	17.3311	30.6836	41.4743	43.0774
NBb	28.6194	30.9739	31.8737	34.0918	37.411
SG	12.8233	24.6665	29.97	30.4891	48.0361
Erin	12.903	22.0918	25.7408	26.8291	28.3053
DL	6.48634	15.654	18.6042	22.5628	35.4848
RH	7.17341	15.2012	26.3036	32.2808	45.8946
